# Supplementary material for: A wheat/rye polymorphism affects seminal root length and yield across different irrigation regimes
Source: PubMed Central journal article supplement — J Exp Bot. 2019 Apr 12;70(15):4027–37. doi: 10.1093/jxb/erz169 (PMC6685657; doi:10.1093/jxb/erz169), 2019-04-12
Supplement: erz169_suppl_supplementary_figures_s1-s6_tables_s1-s19.pdf [file erz169_suppl_supplementary_figures_s1-s6_tables_s1-s19.pdf]

## SUPPLEMENTARY FILE

### Supplementary Figures

**Supplementary Fig. S1. Excavation of the first block including the four genotypes (1RS, 1RS<sup>RW</sup>, 1RS<sup>WR</sup>, 1RS<sup>WW</sup>).** The holes below the center of each plot (20 to 140 cm deep) indicate where the horizontal soil core samples were taken. Samples from 160 cm and 180 cm were taken from the other two blocks after we discovered the presence of roots at 140 cm in block 1. Plants were at the tillering stage at the time of the root sampling.

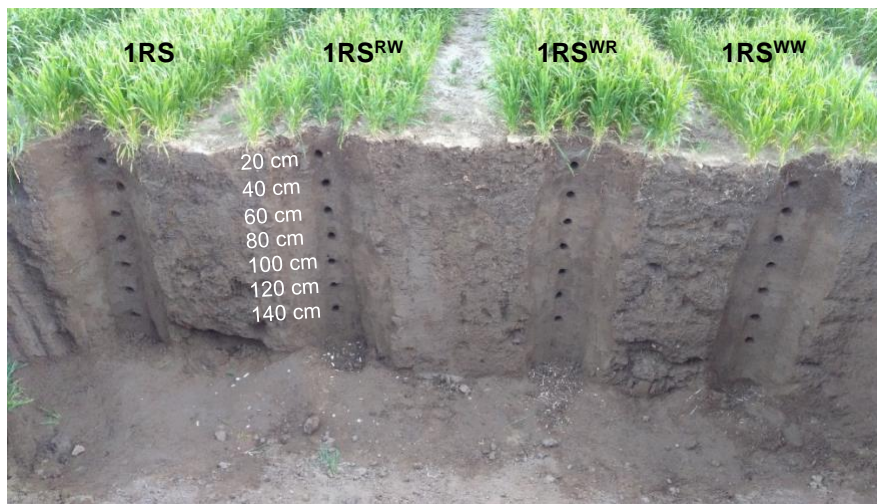

**Supplementary Fig. S2. Plant biomass and grain yield.** Plant biomass estimated by NDVI (A) and grain yield (B) under normal irrigation (control), waterlogging and drought conditions. Plants with the distal rye segment include the original Hahn-1RS lines (RR) and the line with the proximal wheat segment (WR = 1RS<sup>WR</sup>). Plants with the distal wheat segment include the line with both wheat segments (WW = 1RS<sup>WW</sup>) and with only the distal wheat segment (RW = 1RS<sup>RW</sup>). Note the similar response of the lines with a similar distal chromosome segment. Differences between genotypes were generally larger under water stress conditions.

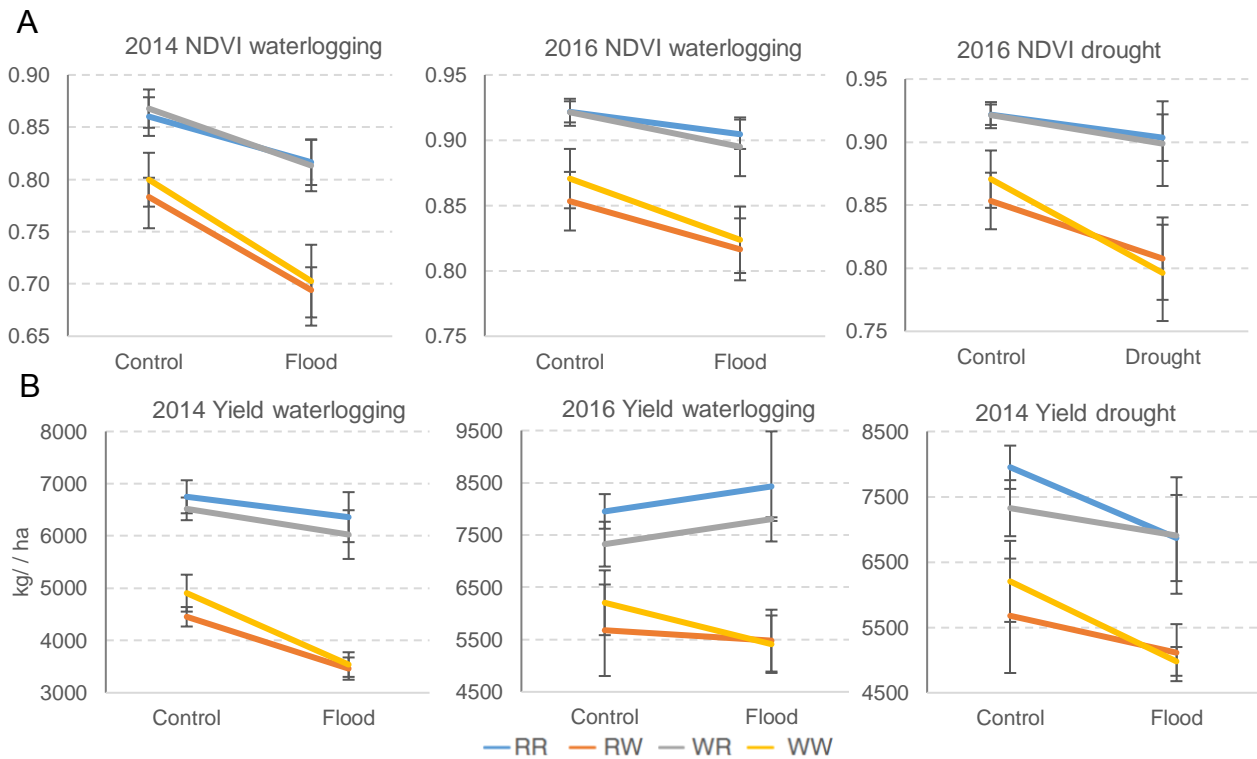

**Supplementary Fig. S3. Percent difference in total root length density and diameter.**

Differences between genotypes expressed as a percent of the  $1RS^{xR}$  values ( $((1RS^{xR} - 1RS^{xW}) / 1RS^{xR}) * 100$ ). **A)** Percent difference in total root length. **B)** Percent difference in average root diameter. Error bars represent standard errors of the means across blocks.

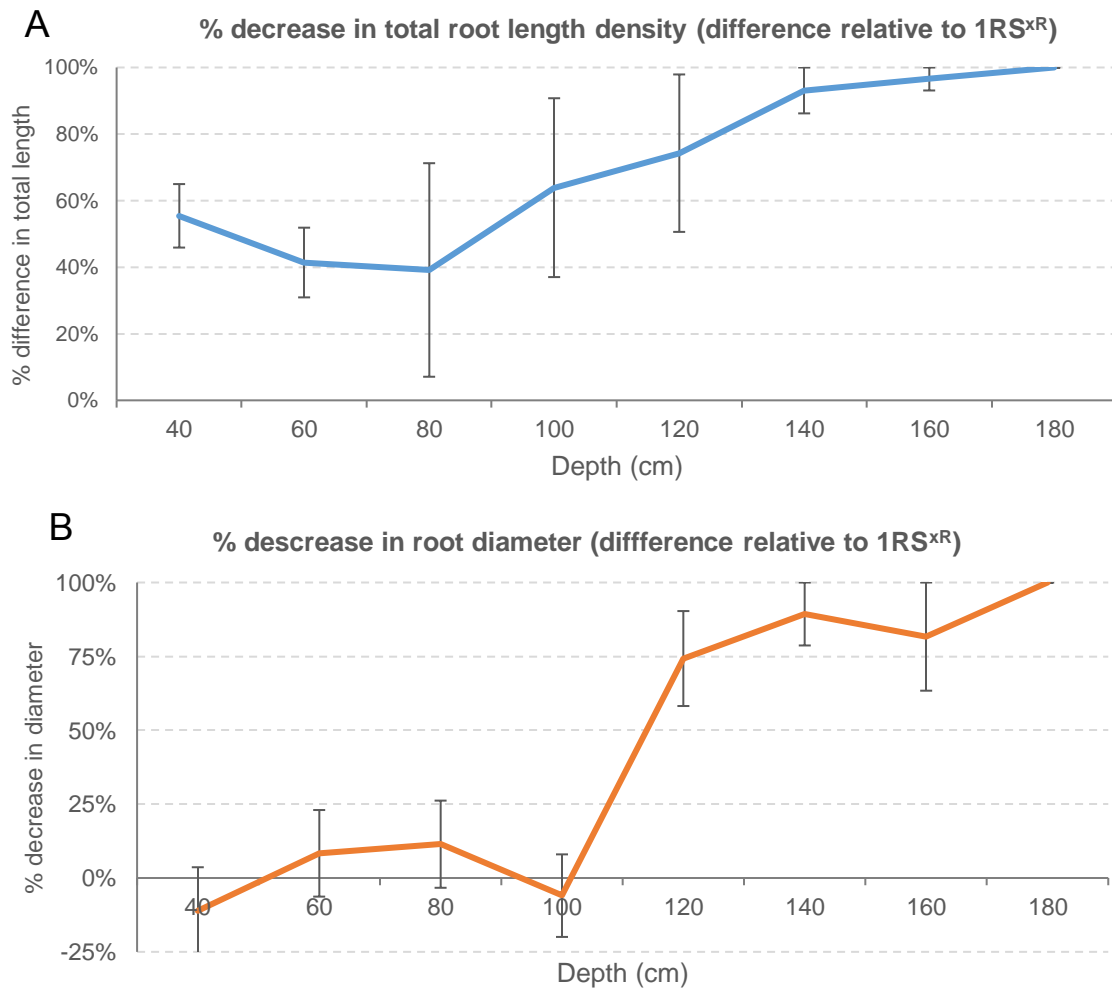

**Supplementary Fig. S4. Differences between 1RS<sup>xR</sup> and 1RS<sup>xW</sup> in different root parameters with depth.** The experiment is organized in a split plot design with 4 genotypes as main plots and depths as subplots. **A)** Root surface (SQRT (x+0.5)). **B)** Root volume ((x+1)<sup>-4</sup>). **C)** Number of root tips (SQRT (x+0.5)). **D)** Number of root forks (SQRT (x+0.5)). *P* values were calculated using contrasts between 1RS<sup>xR</sup> and 1RS<sup>xW</sup> lines in individual ANOVAs by depth. Error bars represent standard errors of the means across blocks. *P* values are from transformed data (to meet the assumptions of the ANOVA) and means and SE are untransformed.

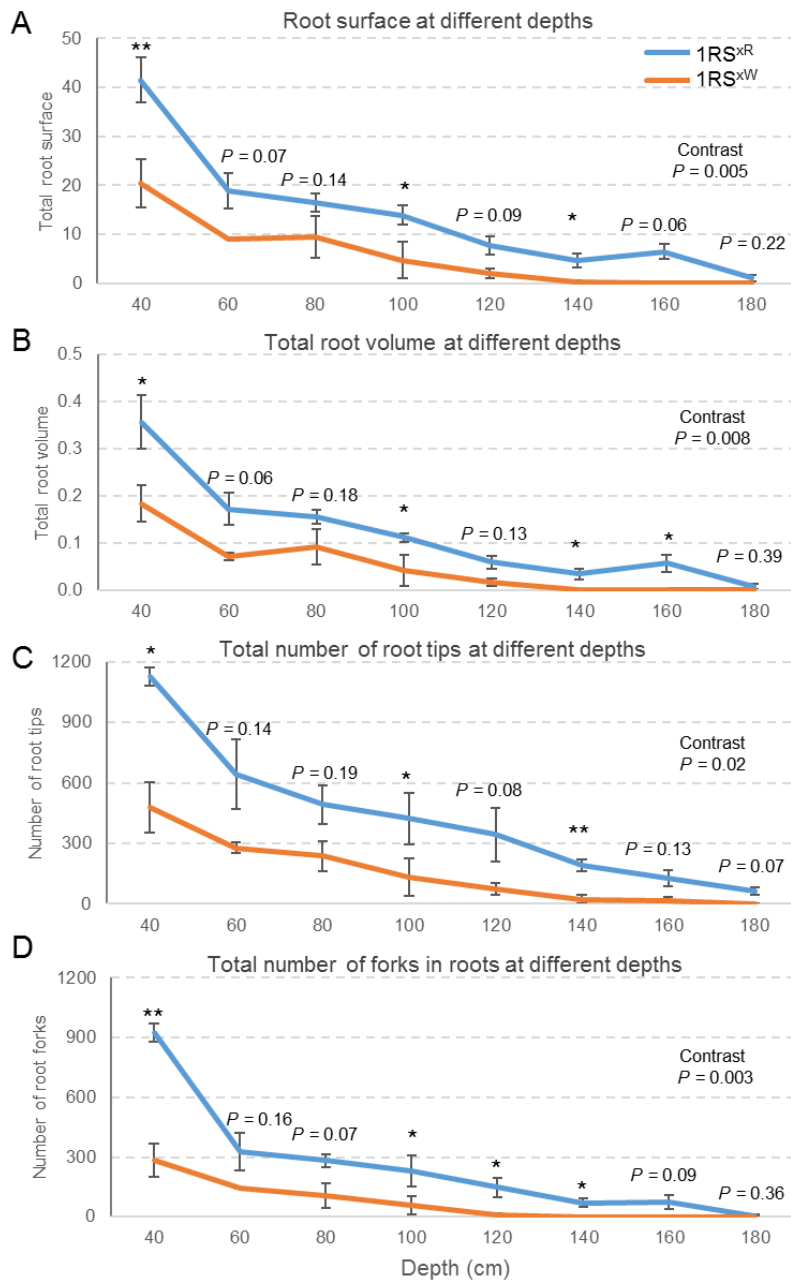

**Supplementary Fig. S5. Comparison of the distances between the primary root apex and the first lateral root** in lines carrying the distal rye (1RS and 1RS<sup>WR</sup>) versus the ones carrying the distal wheat segment (1RS<sup>WW</sup> and 1RS<sup>RW</sup>) in plants grown in hydroponics conditions for 22 days after germination under 2 mM nitrate. Lateral roots were significantly closer to the primary root apical meristem in lines with the distal wheat segment than in the lines with the distal rye segment ( $P = 2.5 \text{ E}^{-7}$ , total n=12). No significant differences were detected between the lines differing in the proximal wheat and rye segments.

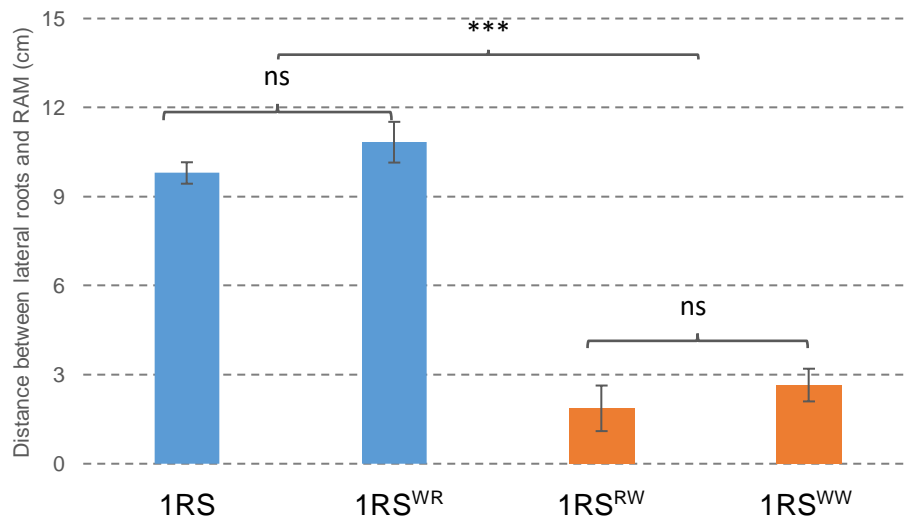

**Supplementary Fig. S6.** Distribution of nitro blue tetrazolium (NBT) staining during root development in plants grown under low nitrate conditions (0.2 mM nitrate). No differences were detected between 1RS and 1RS<sup>RW</sup> lines six days after germination (DAG). At 9 DAG, stained primordia of the lateral roots close to the root apical meristem (RAM) are evident in 1RS<sup>RW</sup> but not in the 1RS. By 15 DAG, lateral roots are formed close to the RAM in 1RS<sup>RW</sup> but no lateral root initiation is observed in the 1RS line close to the RAM (experiment performed at Davis).

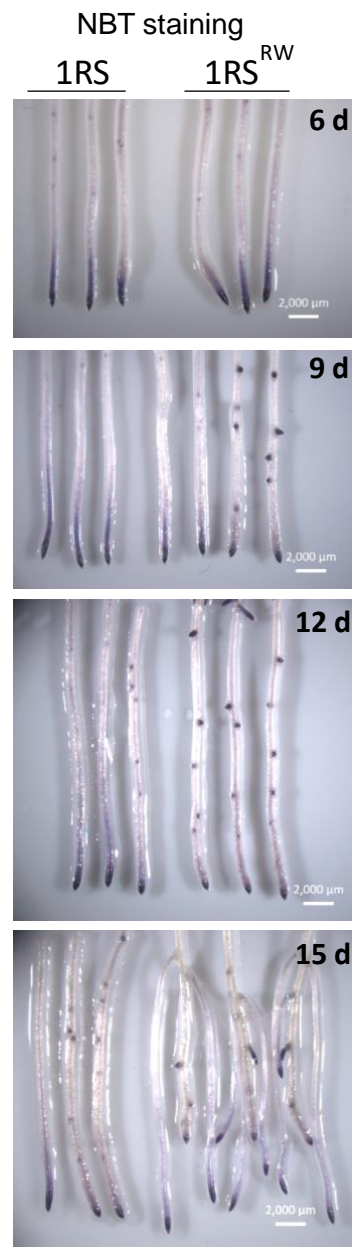

## Supplementary Tables

**Supplementary Table S1a. NDVI waterlogging 2013-2014.** Split plot RCBD repeated in time ANOVA table for the Normalized Difference Vegetation Index (NDVI). Main plots are waterlogging and normal irrigation, subplots are the genotypes  $1RS^{xR}$  (averaged  $1RS$  and  $1RS^{WR}$ ) and  $1RS^{xW}$  (averaged  $1RS^{RW}$  and  $1RS^{WW}$ ), and sub-sub plots are days. Since there is only one degree of freedom for days, we did not calculate conservative degrees of freedom.

| Source                    | df | Type III SS | Mean Sq. | F Value | Pr > F |
|---------------------------|----|-------------|----------|---------|--------|
| <b>Main plot</b>          |    |             |          |         |        |
| Treat                     | 1  | 0.04034     | 0.04034  | 90.30   | 0.0025 |
| Block                     | 3  | 0.00447     | 0.00149  | 3.34    | 0.1743 |
| Error: Block*Treat        | 3  | 0.00134     | 0.00045  |         |        |
| Genot.                    | 1  | 0.07140     | 0.07140  | 407.17  | <.0001 |
| Treat*Genot               | 1  | 0.00386     | 0.00386  | 22.02   | 0.0034 |
| Error: Block*Treat*Genot. | 6  | 0.00105     | 0.00018  |         |        |
| day                       | 1  | 0.13770     | 0.13770  | 1130.10 | <.0001 |
| day*Treat                 | 1  | 0.00100     | 0.00100  | 8.25    | 0.0232 |
| day*Genot                 | 1  | 0.00618     | 0.00618  | 50.75   | <.0001 |
| day*Treat*Genot           | 1  | 0.00007     | 0.00007  | 0.60    | 0.4518 |
| Error                     | 12 | 0.00146     | 0.00012  |         |        |

R-square= 0.99456

**Supplementary Table S2. NDVI waterlogging 2013-2014 by day.** Because the day \* genotype was significant we also analyzed the individual split plot ANOVAs by individual days. The significance of treatment and block effects was tested using the Block\*Treatment as error (df = 3) and the significance of Genotype and Treatment \* Genotype using the residual error (df = 6)

| Source      | df | April 17<br>P | April 30<br>P |
|-------------|----|---------------|---------------|
| Treat       | 1  | <.0001        | 0.0083        |
| Block       | 3  | 0.0126        | 0.3453        |
| Genotype    | 1  | <.0001        | <.0001        |
| Treat*Genot | 1  | 0.0032        | 0.0097        |

**Supplementary Table S3. Yield waterlogging 2013-2014.** Split plot RCBD ANOVA table for grain yield. 2013-2014 field experiments at Davis, CA. Main plots are waterlogging and normal irrigation and subplots are the genotypes 1RS<sup>xR</sup> (averaged 1RS and 1RS<sup>WR</sup>) and 1RS<sup>xW</sup> (averaged 1RS<sup>RW</sup> and 1RS<sup>WW</sup>).

| Source      | df | Type III SS | Mean Sq. | F Value | Pr > F |
|-------------|----|-------------|----------|---------|--------|
| Treat       | 1  | 2623671     | 2623671  | 3.56    | 0.1556 |
| Block       | 3  | 510586      | 170195   | 0.23    | 0.8701 |
| Block*Treat | 3  | 2210786     | 736929   |         |        |
| Genot       | 1  | 21593447    | 21593447 | 138.98  | <.0001 |
| Treat*Genot | 1  | 545493      | 545493   | 3.51    | 0.1101 |
| Error       | 6  | 932244      | 155374   |         |        |

R-square= 0.967193

**Supplementary Table S4. NDVI waterlogging 2015-2016.** Split plot RCBD repeated in time ANOVA table for the Normalized Difference Vegetation Index (NDVI). Main plots are waterlogging and normal irrigation, subplots are genotypes with 1RS<sup>xR</sup> (averaged 1RS and 1RS<sup>WR</sup>) and 1RS<sup>xW</sup> (averaged 1RS<sup>RW</sup> and 1RS<sup>WW</sup>), and sub-sub plots are the four days. Since it is not possible to randomize days, *P* values were calculated using conservative degrees of freedom (indicated in blue, and calculated by dividing by df days= 3).

| Source                    | df | Type III SS | Mean Sq. | F Value | Pr > F   |        |        |
|---------------------------|----|-------------|----------|---------|----------|--------|--------|
| <b>Main plot</b>          |    |             |          |         |          |        |        |
| Treat                     | 1  | 0.01214     | 0.01214  | 960.33  | 0.0010   |        |        |
| Block                     | 2  | 0.00307     | 0.00154  | 121.57  | 0.0082   |        |        |
| Error: Block*Treat        | 2  | 0.00002     | 0.00001  |         |          |        |        |
| Genot                     | 1  | 0.05815     | 0.05815  | 266.34  | <.0001   |        |        |
| Treat*Genot               | 1  | 0.00121     | 0.00121  | 5.53    | 0.0783   |        |        |
| Error: Block*treat*Genot. | 4  | 0.00087     | 0.00022  |         |          |        |        |
|                           | df | Con.df      |          |         | <i>P</i> | Con.df |        |
| day                       | 3  | 1           | 0.14303  | 0.14303 | 894.6    | <.0001 | <.0001 |
| day*Treat                 | 3  | 1           | 0.00161  | 0.00161 | 10.1     | 0.0002 | 0.0130 |
| day*Genot                 | 3  | 1           | 0.02108  | 0.02108 | 131.5    | <.0001 | <.0001 |
| day*Treat*Genot           | 3  | 1           | 0.00059  | 0.00059 | 3.7      | 0.0253 | 0.0906 |
| Error                     | 24 | 8           | 0.00128  | 0.00005 |          |        |        |

R-square= 0.9947



**Supplementary Table S5. NDVI waterlogging 2015-2016 by day.** Because the day \* genotype was significant we also analyzed the individual split plot ANOVAs by individual days. The significance of treatment and block effects was calculated using the Block\*Treatment as error (df = 2) and the significance of Genotype and Treatment \* Genotype using the residual error (df = 4). The four NDVI measurement were taken before the breakage of the irrigation pipeline, so are not affected by this accident.

| Source      | df | March 24<br><i>P</i> | April 6<br><i>P</i> | April 13<br><i>P</i> | April 28<br><i>P</i> |
|-------------|----|----------------------|---------------------|----------------------|----------------------|
| Treat       | 1  | 0.0110               | 0.0057              | 0.0133               | 0.0146               |
| Block       | 2  | 0.0383               | 0.0291              | 0.2118               | 0.0972               |
| Genotype    | 1  | 0.0080               | 0.0008              | 0.0009               | <.0001               |
| Treat*Genot | 1  | 0.9137               | 0.0595              | 0.0687               | 0.1587               |

**Supplementary Table S6. Yield waterlogging 2015-2016.** Split plot RCBD ANOVA table for grain yield. Main plots are waterlogging and normal irrigation, whereas subplots are genotypes with  $1RS^{xR}$  (averaged  $1RS$  and  $1RS^{WR}$ ) or  $1RS^{xW}$  (averaged  $1RS^{RW}$  and  $1RS^{WW}$ ). The broken irrigation pipeline increased variability and contributed to the absence of treatment differences.

| Source             | df       | Type III SS    | Mean Sq.      | F Value     | Pr > F        |
|--------------------|----------|----------------|---------------|-------------|---------------|
| Treat              | 1        | 218            | 218           | 0.00        | 0.9772        |
| Block              | 2        | 4048744        | 2024372       | 9.58        | 0.945         |
| <b>Block*Treat</b> | <b>2</b> | <b>422468</b>  | <b>211234</b> | <b>0.44</b> | <b>0.6702</b> |
| Genot              | 1        | 14317650       | 14317650      | 30.03       | 0.0054        |
| Treat*Genot        | 1        | 711945         | 711945        | 1.49        | 0.2888        |
| <b>Error</b>       | <b>4</b> | <b>1906973</b> | <b>476743</b> |             |               |

R-square= 0.91092

**Supplementary Table S7. NDVI drought 2015-2016.** Split plot RCBD repeated in time ANOVA table for the Normalized Difference Vegetation Index (NDVI). Main plots are terminal drought and normal irrigation, subplots are the genotypes 1RS<sup>xR</sup> (averaged 1RS and 1RS<sup>WR</sup>) and 1RS<sup>xW</sup> (averaged 1RS<sup>RW</sup> and 1RS<sup>WW</sup>), and sub-sub plots are the four days. Since it is not possible to randomize days, P values were calculated using conservative degrees of freedom (in blue, calculated by dividing by df days= 3).

| Source                    | df | Type III SS | Mean Sq. | F Value  | Pr > F |        |        |
|---------------------------|----|-------------|----------|----------|--------|--------|--------|
| <b>Main plot</b>          |    |             |          |          |        |        |        |
| Treat                     | 1  | 0.019388    | 0.019388 | 7.38     | 0.1130 |        |        |
| Block                     | 2  | 0.000617    | 0.000309 | 0.12     | 0.8949 |        |        |
| Error: Block*Treat        | 2  | 0.005254    | 0.002627 |          |        |        |        |
| Genot.                    | 1  | 0.075617    | 0.075617 | 171.84   | 0.0002 |        |        |
| Treat*Genot               | 1  | 0.004705    | 0.004705 | 10.69    | 0.0308 |        |        |
| Error: Block*treat*Genot. | 4  | 0.001760    | 0.000440 |          |        |        |        |
|                           | df | Con.df      |          |          | P      | Con.df |        |
| day                       | 3  | 1           | 0.231431 | 0.077144 | 434.07 | <.0001 | <.0001 |
| day*Treat                 | 3  | 1           | 0.017311 | 0.005770 | 32.47  | <.0001 | 0.0005 |
| day*Genot                 | 3  | 1           | 0.025883 | 0.008628 | 48.55  | <.0001 | 0.0001 |
| day*Treat*Genot           | 3  | 1           | 0.000529 | 0.000176 | 0.99   | 0.4134 | 0.35   |
| Error                     | 24 | 8           | 0.004265 | 0.000178 |        |        |        |

R-square= 0.98897

**Supplementary Table S8. NDVI drought 2015-2016 by day.** Because the day \* genotype was significant we also analyzed the individual split plot ANOVAs by individual days. The significance of treatment and block effects was calculated using the Block\*Treatment as error (df = 2) and the significance of Genotype and Treatment \* Genotype using the residual error (df = 4)

| Source      | df | March 24<br>P | April 6<br>P | April 13<br>P | April 28<br>P |
|-------------|----|---------------|--------------|---------------|---------------|
| Treat       | 1  | 0.2372        | 0.3538       | 0.2148        | 0.0562        |
| Block       | 2  | 0.8203        | 0.7723       | 0.8138        | 0.7577        |
| Genotype    | 1  | 0.0128        | 0.0049       | 0.0011        | <.0001        |
| Treat*Genot | 1  | 0.0984        | 0.1885       | 0.1559        | 0.0005        |

**Supplementary Table S9. Yield drought 2015-2016.** Split plot RCBD ANOVA table for grain yield. Main plots are waterlogging and normal irrigation and subplots are the genotypes 1RS<sup>xR</sup> (average 1RS and 1RS<sup>WR</sup>) and 1RS<sup>xW</sup> (average 1RS<sup>RW</sup> and 1RS<sup>WW</sup>).

| Source      | df | Type III SS | Mean Sq. | F Value | Pr > F |
|-------------|----|-------------|----------|---------|--------|
| Treat       | 1  | 2030506     | 2030506  | 0.83    | 0.4587 |
| Block       | 2  | 961895      | 480948   | 0.20    | 0.8359 |
| Block*treat | 2  | 4900514     | 2450257  |         |        |
| Genot       | 1  | 9389144     | 9389144  | 22.81   | 0.0088 |
| Treat*Genot | 1  | 15394       | 15394    | 0.04    | 0.8561 |
| Error       | 4  | 1646190     | 411547   |         |        |

R-square= 0.9131

**Supplementary Table S10. Total root length density.** Split plot – RCBD ANOVA for the excavation experiment including genotypes as main plots (averages of 1RS and 1RS<sup>WR</sup> and 1RS<sup>RW</sup> and 1RS<sup>WW</sup>) and depths as subplots. Conservative degrees of freedom (in blue) were used to test the significance of Depth and Genotype \* Depth because depths cannot be randomized. This approach is very conservative and the correct *P* value is between the two estimates. This does not affect the significance of the differences between genotypes, which is the main objective of this analysis.

| Source                 | df | Type III SS | Mean Sq. | F Value | Pr > F   |         |       |
|------------------------|----|-------------|----------|---------|----------|---------|-------|
| <b>Main plot</b>       |    |             |          |         |          |         |       |
| Genot                  | 1  | 64176       | 64176    | 36.58   | 0.0263   |         |       |
| Block                  | 2  | 13794       | 6897     | 3.93    | 0.2028   |         |       |
| Main error Block*Genot | 2  | 3509        | 1754     |         |          |         |       |
| <b>Subplots</b>        |    |             |          |         |          |         |       |
|                        | df | Cons.df     |          |         | <i>P</i> | Cons.df |       |
| Depth                  | 7  | 1           | 327458   | 46780   | 25.07    | <.0001  | 0.007 |
| Genot*Depth            | 7  | 1           | 31705    | 4529    | 2.43     | 0.0497  | 0.190 |
| Subplot Error          | 24 | 3.4         | 44781    | 1866    |          |         |       |

R-square= 0.806

**Supplementary Table S11. Total root length density contrast.** The previous analysis (Table S10) has limited degrees of freedom for genotype ( $v_1=1, v_2=2$ ), so we performed an alternative ANOVA including the four genotypes and a statistical contrast between the lines with distal rye and wheat segments ( $v_1=1, v_2=6$ ).

| Source                  | df | Type III SS | Mean Sq. | F Value | Pr > F       |
|-------------------------|----|-------------|----------|---------|--------------|
| Contrast distal R vs. W | 1  | 504.23      | 504.23   | 19.64   | <b>0.004</b> |
| Error Block*Gen         | 6  | 154.07      | 25.68    |         |              |

<sup>1</sup> Data transformed (SQRT(length +0.05)) to optimize homogeneity of variances and normality of residuals.

**Supplementary Table S12. Total root length density contrast by depth.** Alternative ANOVA including the four genotypes and a statistical contrast between the lines with distal rye and wheat segments by depth.

| Source                      | 40 cm  | 60 cm  | 80 cm  | 100 cm | 120 cm | 140 cm | 160 cm | 180 cm |
|-----------------------------|--------|--------|--------|--------|--------|--------|--------|--------|
| Contrasts<br>distal R vs. W | 0.0020 | 0.1279 | 0.1313 | 0.0347 | 0.0844 | 0.0180 | 0.0678 | 0.1687 |

<sup>1</sup> Data transformed (SQRT(length +0.05)) to optimize homogeneity of variances and normality of residuals.

**Supplementary Table S13. Average root diameter.** Split plot RCBD ANOVA table for the excavation experiment using genotypes as main plots (averages of 1RS and 1RS<sup>WR</sup> and 1RS<sup>RW</sup> and 1RS<sup>WW</sup>) and depths as subplots. Conservative degrees of freedom (in blue) were used to test the significance of Depth and Genotype \* Depth. This is a very conservative approach and the correct *P* value is between the two estimates. This does not affect the significance of the differences between genotypes, which is the main objective of this analysis.

| Source                 | df        | Type III SS    | Mean Sq.  | F Value   | Pr > F   |                |             |
|------------------------|-----------|----------------|-----------|-----------|----------|----------------|-------------|
| <b>Main plot</b>       |           |                |           |           |          |                |             |
| Genot                  | 1         | 0.0083442      | 0.0041721 | 13.92     | 0.0649   |                |             |
| Block                  | 2         | 0.1096073      | 0.1096072 | 0.53      | 0.6536   |                |             |
| Main error Block*Genot | 2         | 0.0157427      | 0.0078713 |           |          |                |             |
| <b>Subplots</b>        |           |                |           |           |          |                |             |
|                        | <b>df</b> | <b>cons.df</b> |           |           | <b>p</b> | <b>cons.df</b> |             |
| Depth                  | 7         | <b>1</b>       | 0.3666487 | 0.0523784 | 19.45    | <0.0001        | <b>0.02</b> |
| Gen*Depth              | 7         | <b>1</b>       | 0.1232096 | 0.0176014 | 6.54     | 0.0002         | <b>0.08</b> |
| Subplot Error          | 24        | 3.4            | 0.0646355 | 0.0026931 |          |                |             |

R-square= 0.68817

**Supplementary Table S14. Average root diameter contrast.** Alternative split plot ANOVA including the four genotypes and a statistical contrast between the lines with distal rye and wheat segments ( $v_1=1v_2=6$ ). More sensitive than Table S13.

| Source                  | df | Type III SS | Mean Sq. | F Value | Pr > F       |
|-------------------------|----|-------------|----------|---------|--------------|
| Contrast distal R vs. W | 1  | 0.21715     | 0.21715  | 16.70   | <b>0.006</b> |
| Main error Block*Genot  | 6  | 0.07800     | 0.01300  |         |              |

**Supplementary Table 15. Average root diameter contrast by depth.** Alternative ANOVA including the four genotypes and a statistical contrast between the lines with distal rye and wheat segments by depth.

| Source                      | 40 cm  | 60 cm  | 80 cm  | 100 cm | 120 cm | 140 cm | 160 cm | 180 cm |
|-----------------------------|--------|--------|--------|--------|--------|--------|--------|--------|
| Contrasts<br>distal R vs. W | 0.3596 | 0.7262 | 0.5726 | 0.8369 | 0.0735 | 0.0012 | 0.0256 | 0.0287 |

**Supplementary Table 16. Repeated measures for root length (mm).** ANOVA between 1RS and 1RS<sup>RW</sup> of the second longest main root measured daily between 6 and 16 d. Within each experiment, data was analyzed as a split plot with genotype as main plot and days as subplot (using conservative df, indicated in blue). The three experiments were combined in a single analysis using experiment as block and reps nested in experiment (Fig. 4A).

| Source          | df  | Type III SS | Mean Sq. | F Value | Pr > F  |         |        |
|-----------------|-----|-------------|----------|---------|---------|---------|--------|
| Exp             | 2   | 143301.9    | 71650.9  | 22.35   | <.0001  |         |        |
| genot           | 1   | 97054.5     | 97054.5  | 30.27   | <.0001  |         |        |
| genot*rep (Exp) | 47  | 150674.8    | 3205.8   |         |         |         |        |
|                 | df  | Cons.df     |          |         | P       | cons.df |        |
| day             | 10  | 1           | 1688462  | 168846  | 1225.49 | <.0001  | <.0001 |
| genot*day       | 10  | 1           | 101971   | 10197   | 74.01   | <.0001  | <.0001 |
| Error           | 490 | 49          | 67512    | 137.8   |         |         |        |

**R-square=** 0.96986

**Supplementary Table S17. Root length (mm) by day.** ANOVAs for each time point combining the three experiments (used as blocks). Untransformed LS means (n=10) obtained from ANOVAs by day.

|                   | 6     | 7     | 8     | 9     | 10    | 11    | 12     | 13     | 14     | 15     | 16     |
|-------------------|-------|-------|-------|-------|-------|-------|--------|--------|--------|--------|--------|
| <b>1RS</b>        | 90.9  | 104.8 | 122.2 | 139.5 | 160.2 | 183.5 | 206.3  | 231.9  | 253.0  | 274.3  | 299.6  |
| 1RS <sup>RW</sup> | 88.6  | 102.8 | 118.8 | 133.3 | 150.9 | 169.3 | 184.9  | 197.9  | 204.9  | 210.6  | 214.6  |
| ANOVA <i>P</i>    | 0.446 | 0.581 | 0.420 | 0.173 | 0.053 | 0.006 | 0.0002 | <.0001 | <.0001 | <.0001 | <.0001 |

**Supplementary Table S18. Repeated measures for root elongation rate (mm/h<sup>-1</sup>).** ANOVA between 1RS and 1RS<sup>RW</sup> for the second longest main root measured daily between 6 and 16 d. Within each experiment, data was analyzed as a split plot with genotype as main plot and days as subplot (using conservative df, indicated in blue). The three experiments were combined in a single analysis using experiment as block and replications nested within experiment (Fig. 4B).

| Source          | df      | Type III SS | Mean Sq. | F Value | Pr > F           |        |        |
|-----------------|---------|-------------|----------|---------|------------------|--------|--------|
| Exp             | 2       | 3.3099      | 1.6550   | 8.95    | 0.0005           |        |        |
| genot           | 1       | 22.9752     | 22.9752  | 124.23  | <.0001           |        |        |
| genot*rep (Exp) | 47      | 8.6921      | 0.1849   |         |                  |        |        |
|                 | Cons.df |             |          |         | <i>P</i> Cons.df |        |        |
| day             | 9       | 1           | 5.9958   | 0.6662  | 13.18            | <.0001 | 0.0007 |
| genot*day       | 9       | 1           | 13.5174  | 1.5019  | 29.72            | <.0001 | <.0001 |
| Error           | 441     | 49          | 22.2881  | 0.0505  |                  |        |        |

R-square=0.7109

Data was transformed to the power of \*\*1.7 to improve normality of residuals

**Supplementary Table S19. Root elongation rate by day.** ANOVAs for each time point combining the three experiments (used as blocks). Untransformed LS means (n=10) obtained from ANOVAs by day.

|                   | 6.5    | 7.5    | 8.5    | 9.5    | 10.5   | 11.5   | 12.5   | 13.5   | 14.5   | 15.5   |
|-------------------|--------|--------|--------|--------|--------|--------|--------|--------|--------|--------|
| <b>1RS</b>        | 0.5794 | 0.7116 | 0.7418 | 0.8622 | 0.9449 | 0.9441 | 1.0136 | 0.8946 | 0.9556 | 1.0128 |
| 1RS <sup>RW</sup> | 0.5997 | 0.6545 | 0.6245 | 0.7335 | 0.7487 | 0.6455 | 0.5141 | 0.2973 | 0.2602 | 0.1630 |
| ANOVA <i>F</i>    | 0.7085 | 0.2923 | 0.0328 | 0.0021 | 0.0006 | <.0001 | <.0001 | <.0001 | <.0001 | <.0001 |

*P* values from transformed data to the power of \*\*1.7 to improve normality of residuals.
